# Supplementary material for: Ezetimibe inhibits triple-negative breast cancer proliferation and promotes cell cycle arrest by targeting the PDGFR/AKT pathway
Source: PubMed Central journal article supplement (PMC10651468; doi:10.1016/j.heliyon.2023.e21343), 2023-10-29
Supplement: mmc2.pdf [file mmc2.pdf]

Fig1D

Ki67

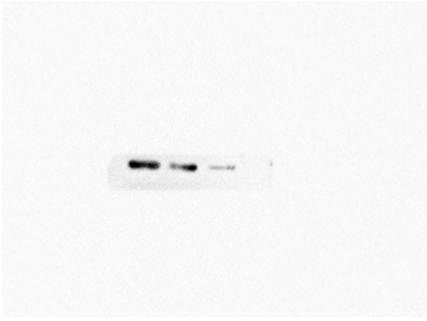

Ki67

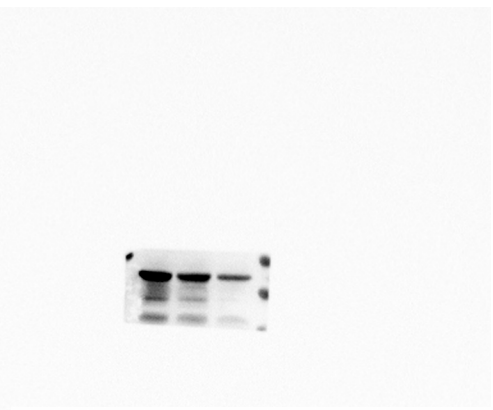

CDK2

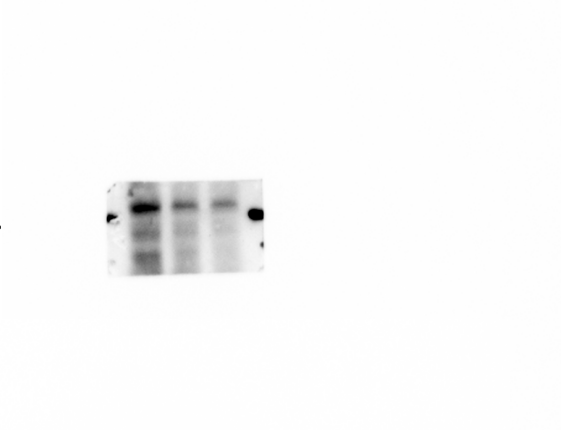

CDK2

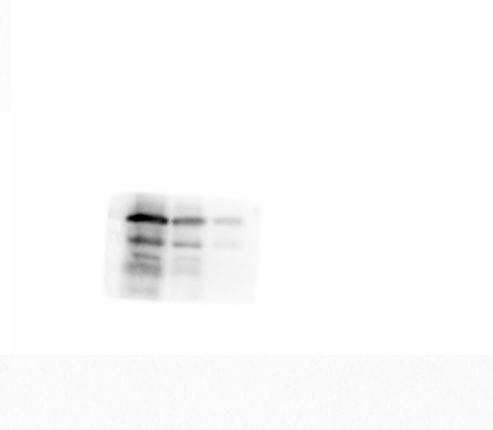

CDK4

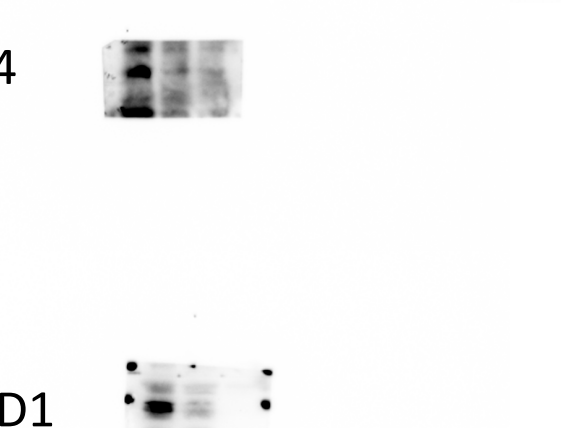

CDK4

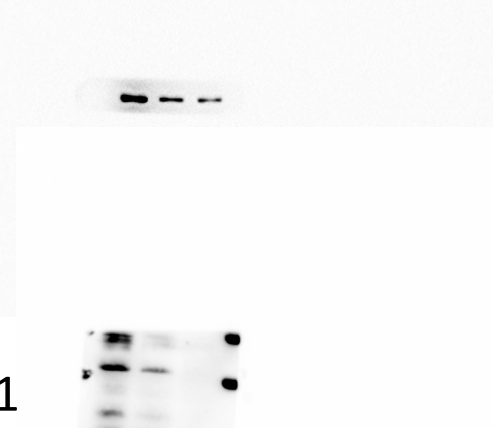

CycinD1

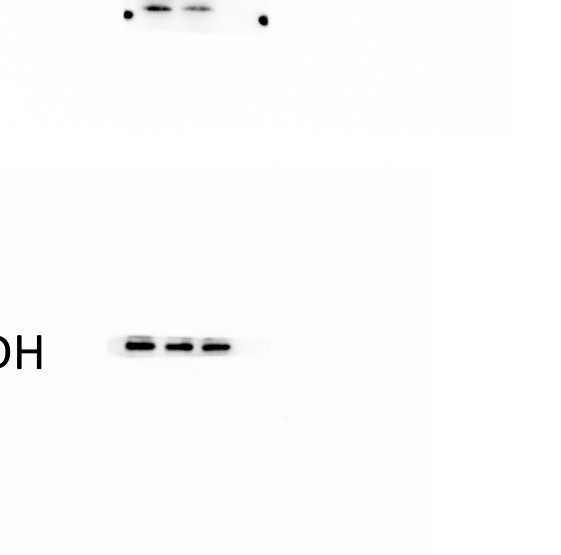

CycinD1

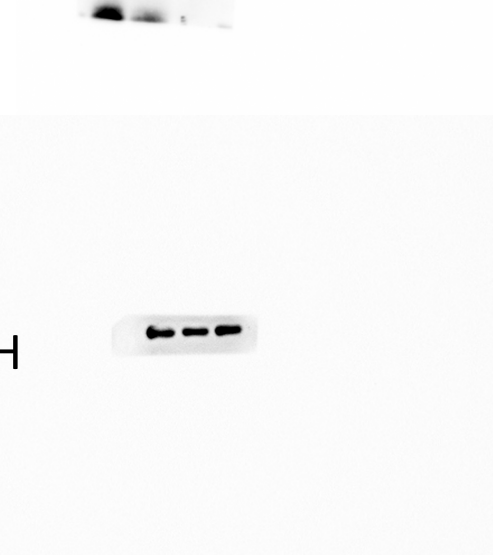

GAPDH

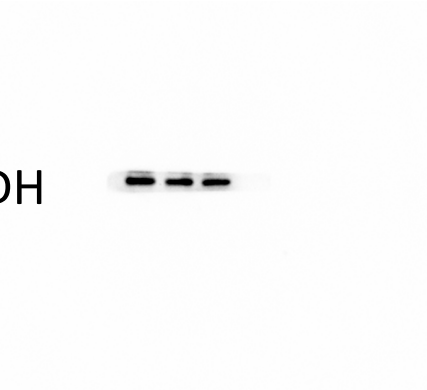

GAPDH

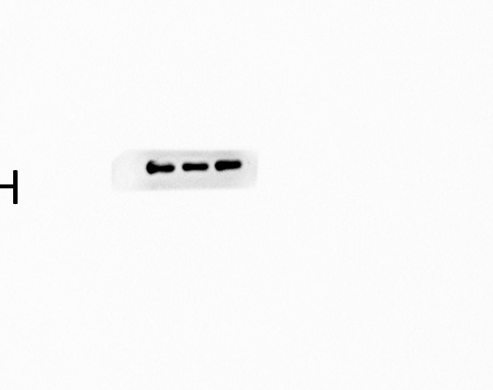

MDA-MB-231

4T1

Fig2F

PDGFR

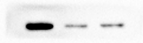

PDGFR

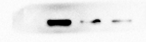

GAPDH

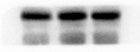

GAPDH

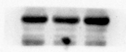

MDA-MB-231

4T1

Fig3B

PDGFR

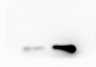

PDGFR

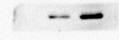

GAPDH

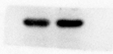

GAPDH

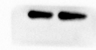

MDA-MB-231

4T1

Fig3E

Ki67

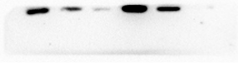

CDK2

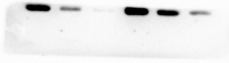

CDK4

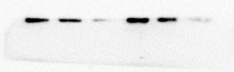

CycinD1

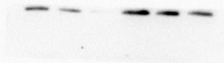

GAPDH

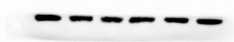

MDA-MB-231

Ki67

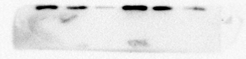

CDK2

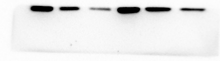

CDK4

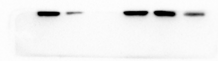

CycinD1

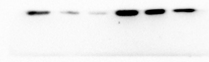

GAPDH

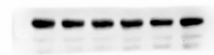

4T1

Fig3F

PDGFR

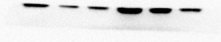

PDGFR

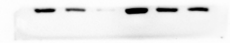

t-AKT

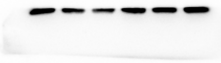

t-AKT

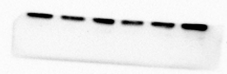

p-AKTS473

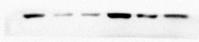

p-AKTS473

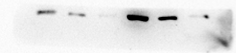

GAPDH

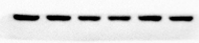

GAPDH

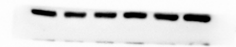

MDA-MB-231

4T1

Fig4B

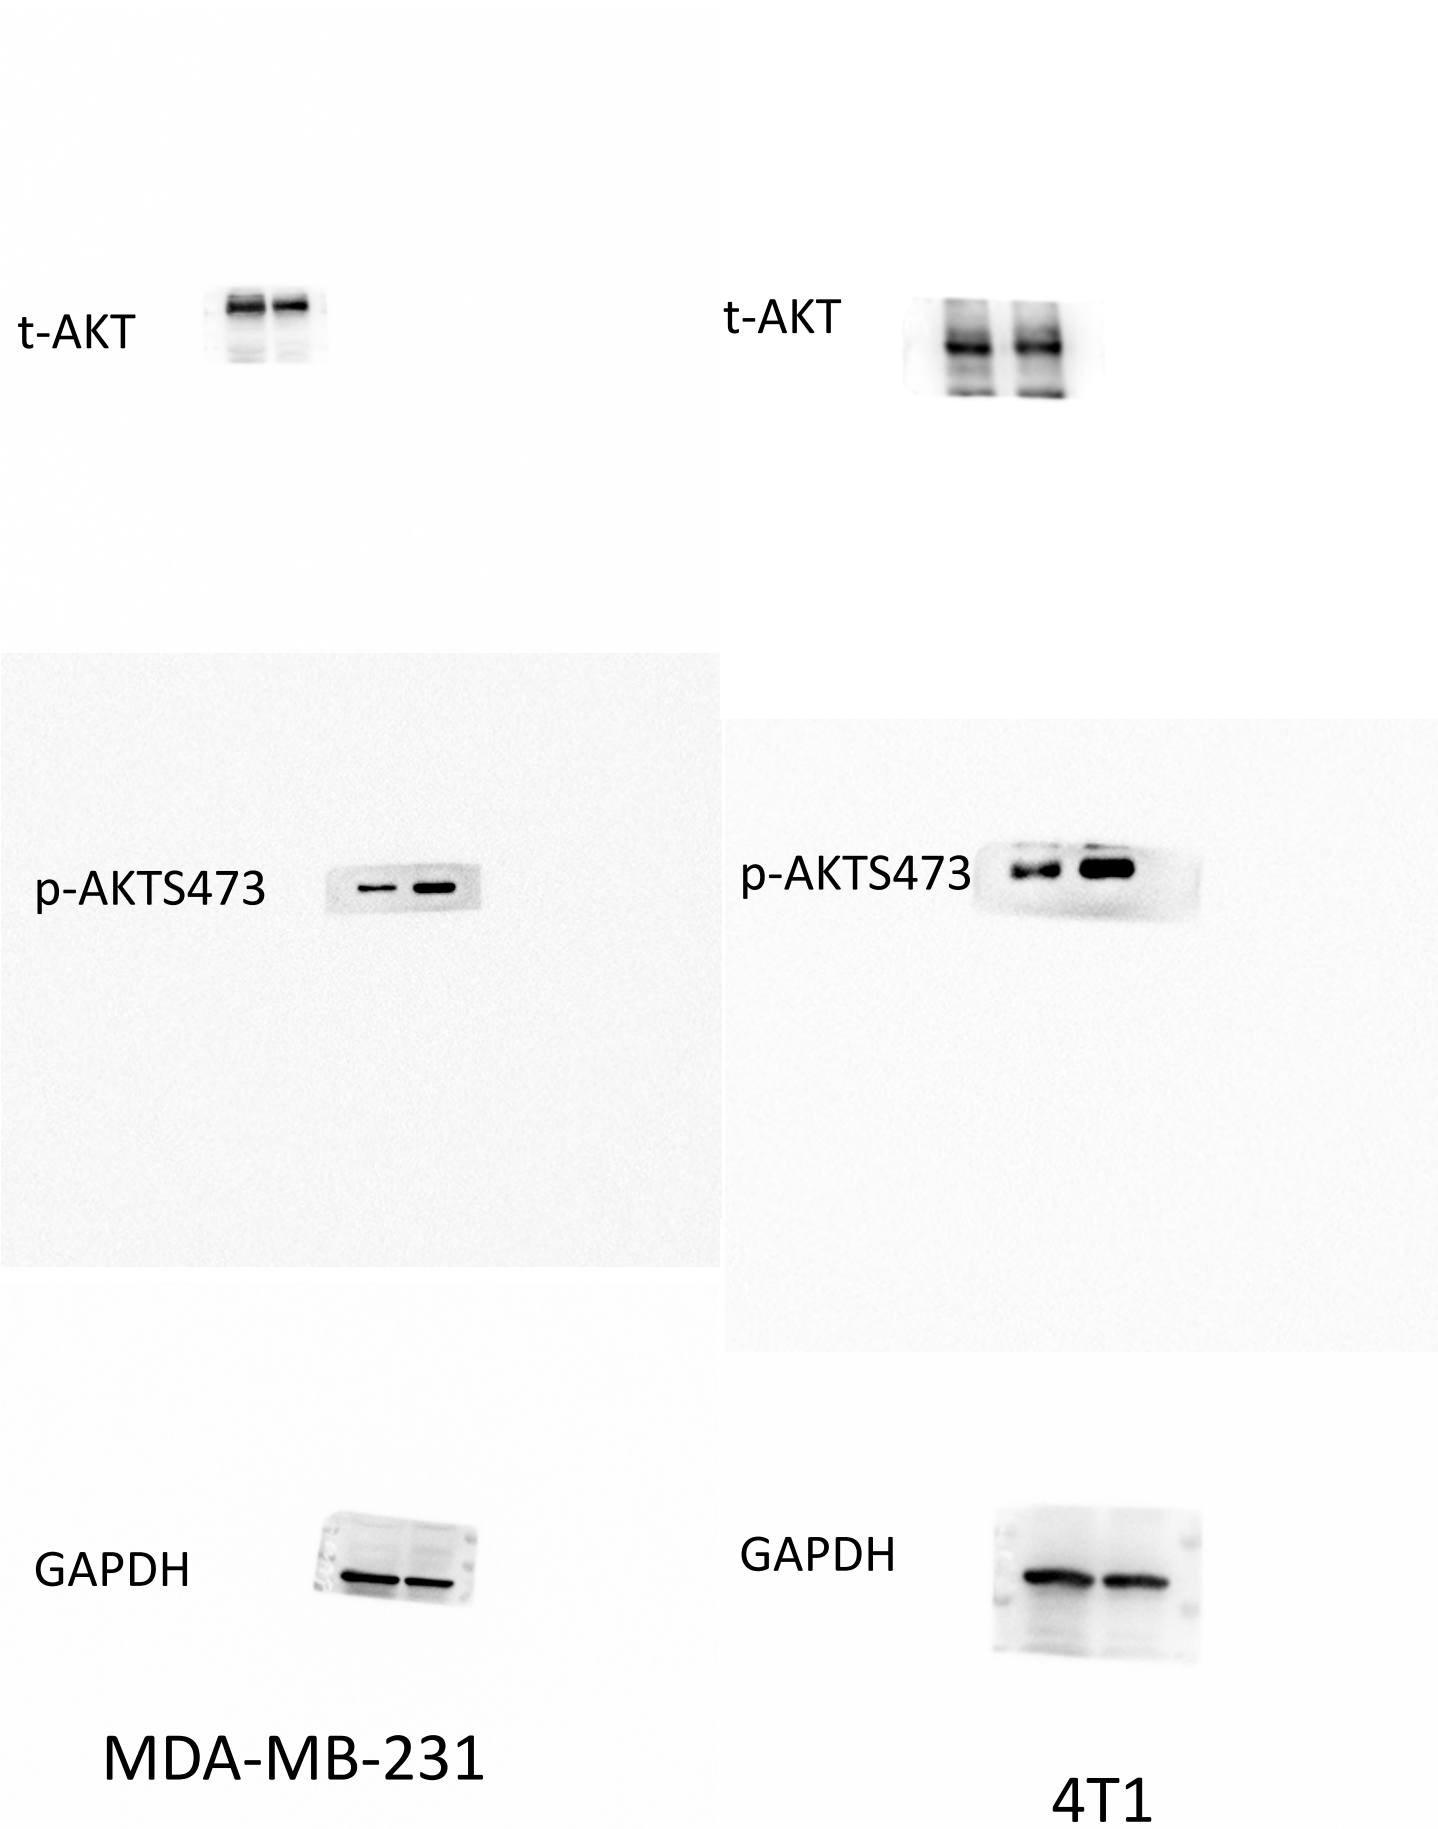

Fig4E

Ki67

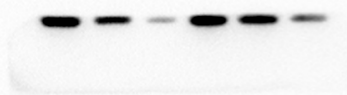

Ki67

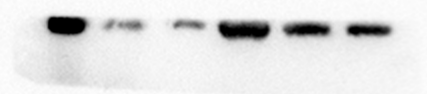

CDK2

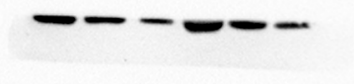

CDK2

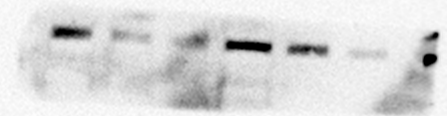

CDK4

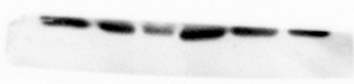

CDK4

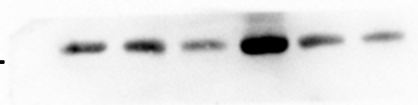

CycinD1

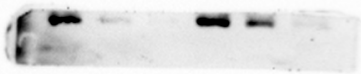

CycinD1

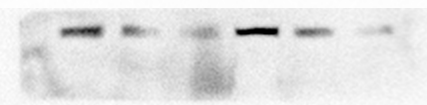

GAPDH

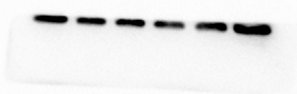

GAPDH

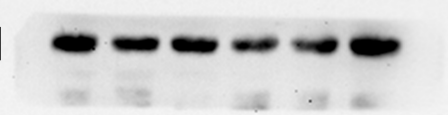

MDA-MB-231

4T1

Fig4F

PDGFR

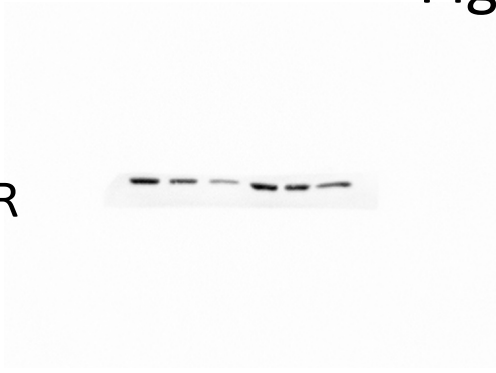

PDGFR

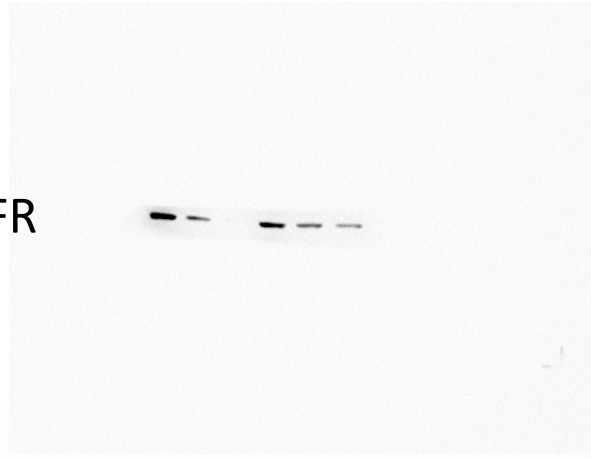

t-AKT

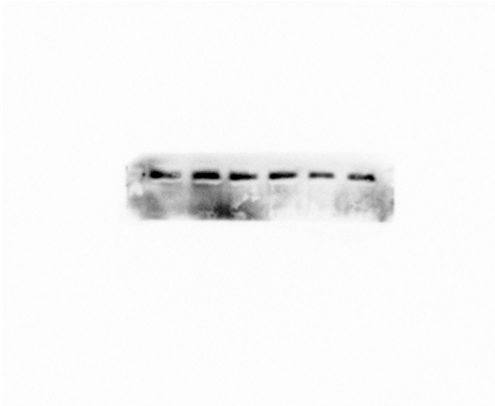

t-AKT

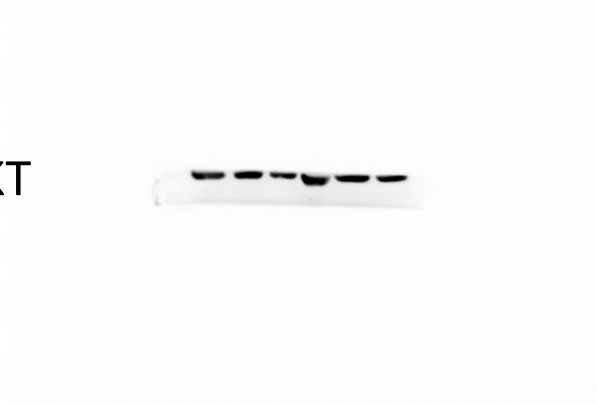

p-AKTS473

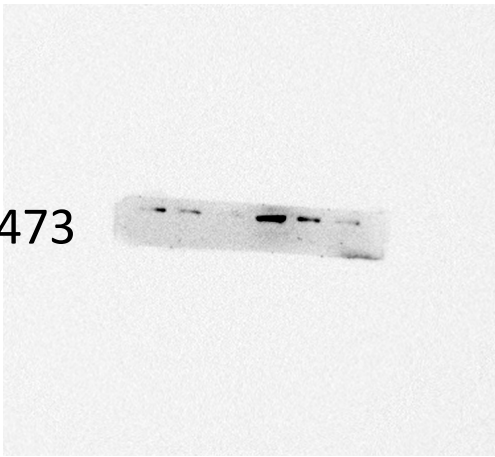

p-AKTS473

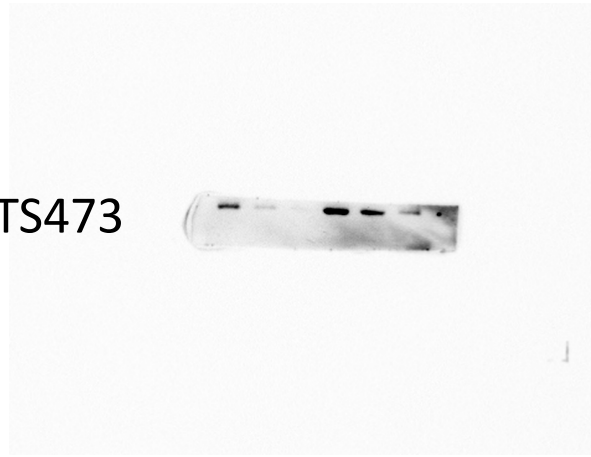

GAPDH

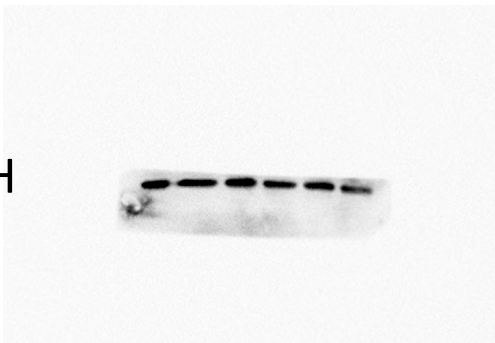

GAPDH

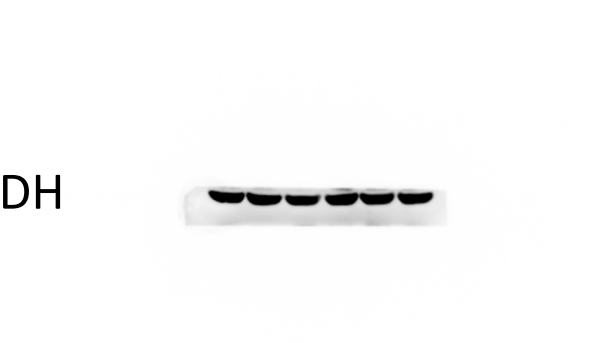

MDA-MB-231

4T1



Fig5B

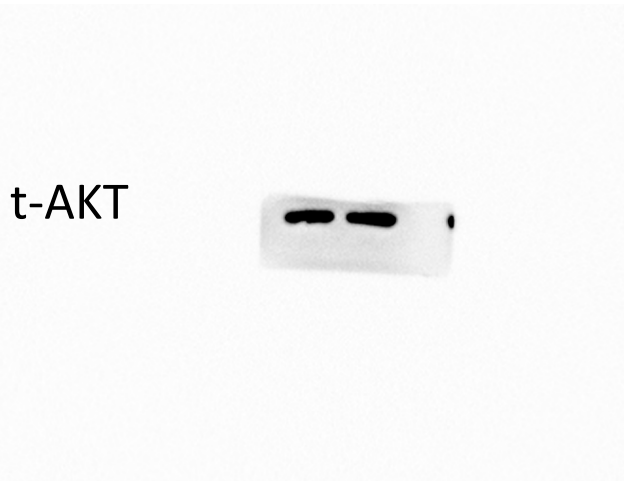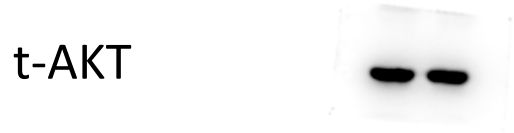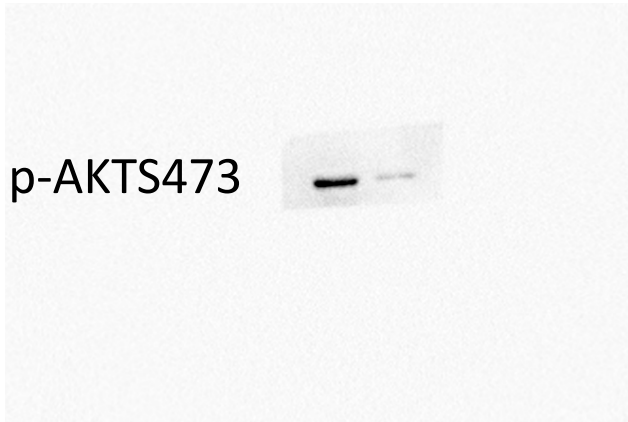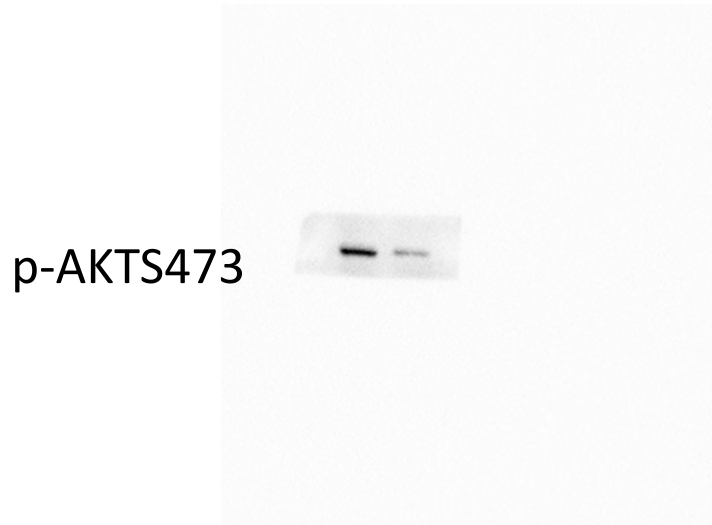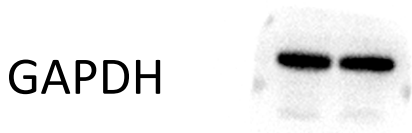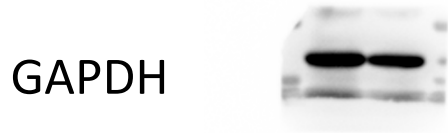

MDA-MB-231

4T1

Fig5E

Ki67

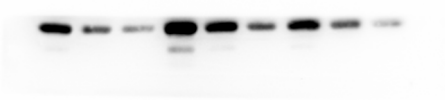

Ki67

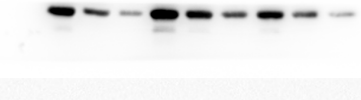

CDK2

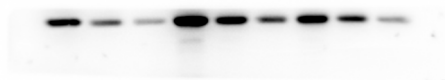

CDK2

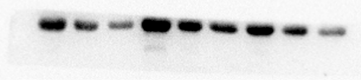

CDK4

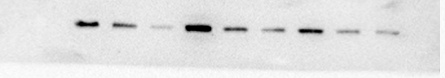

CDK4

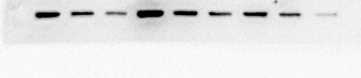

CyclinD1

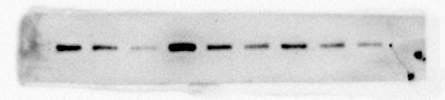

CyclinD1

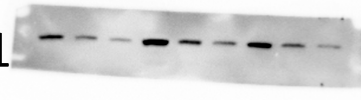

GAPDH

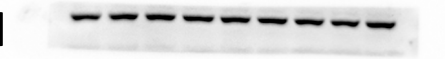

GAPDH

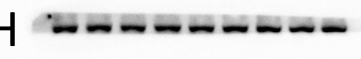

MDA-MB-231

4T1

Fig5F

PDGFR

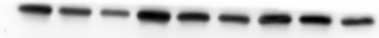

PDGFR

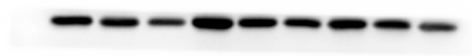

t-AKT

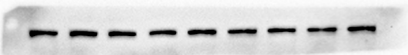

t-AKT

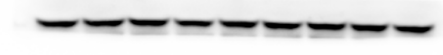

p-AKTS473

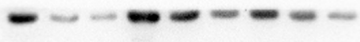

p-AKTS473

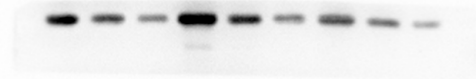

GAPDH

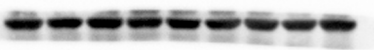

GAPDH

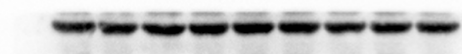

MDA-MB-231

4T1
